# Supplementary material for: A global empirical GIA model based on GRACE data
Source: Copernicus journal article supplement (doi:10.5194/esd-2019-40), 2019-09-03
Supplement: Supplementary file [file esd-2019-40-AC2-supplement.pdf]

Response to comments by Referee 2 (anonymous).

We thank the Referee for their detailed comments about our manuscript. We have largely improved both the methodology and the estimation of the uncertainties. In combination with a number of additional explanations and rewordings, we believe we have been able to address all the points that have been raised.

Before a point-to-point answer, we would like to explain the two major improvements.

1) Error analysis.

Stimulated by the comments by Referees 2 and 3, we have decided to increase the number of viscosity profiles, in order to produce a more reasonable ensemble (indeed, “ensemble” was not a very appropriate term for the mean of four models).

In particular, we have produced GIA fingerprints based on all possible combinations of 6 viscosity values in the upper mantle (range  $1e20$ - $1e21$  Pa s) and 11 viscosity values in the lower mantle (range  $1e21$ - $1e23$  Pa s), giving rise to 66 different earth models. Each earth model has then been used in combination with two different ice histories (as before, ICE-6G or a combination of ANU+GLAC1D for the Northern Hemisphere; IJ05 for Antarctica in all cases), giving rise to 132 sets of GIA fingerprints. Each set is used independently, giving rise to 132 GIA solutions. The result that will be provided in the revised version of our manuscript will then represent the ensemble mean, and the standard deviation of this mean will represent the new solution uncertainty.

We note that the updated GIA model has a slightly smaller contribution to GMSL ( $-0.8$  mm/yr instead of  $-0.9$  mm/yr) and a larger uncertainty ( $0.8$  mm/yr instead of  $0.5$  mm/yr, at 90% confidence).

More importantly, the spatial uncertainty patterns have become much more realistic, with generally larger values under the former ice sheets.

The results for  $J2^{\dot{}}$  reveal a very similar contribution from GIA ( $-2.5 \pm 0.9$   $1e-11$ /yr instead of  $-2.6 \pm 0.2$   $1e-11$ /yr), and a 10% smaller contribution from the water layer ( $6.0 \pm 0.6$   $1e-11$ /yr instead of  $6.7 \pm 0.1$   $1e-11$ /yr); the larger uncertainties are now more realistic.

Below, we reproduce a new figure showing uncertainties in the GIA model.

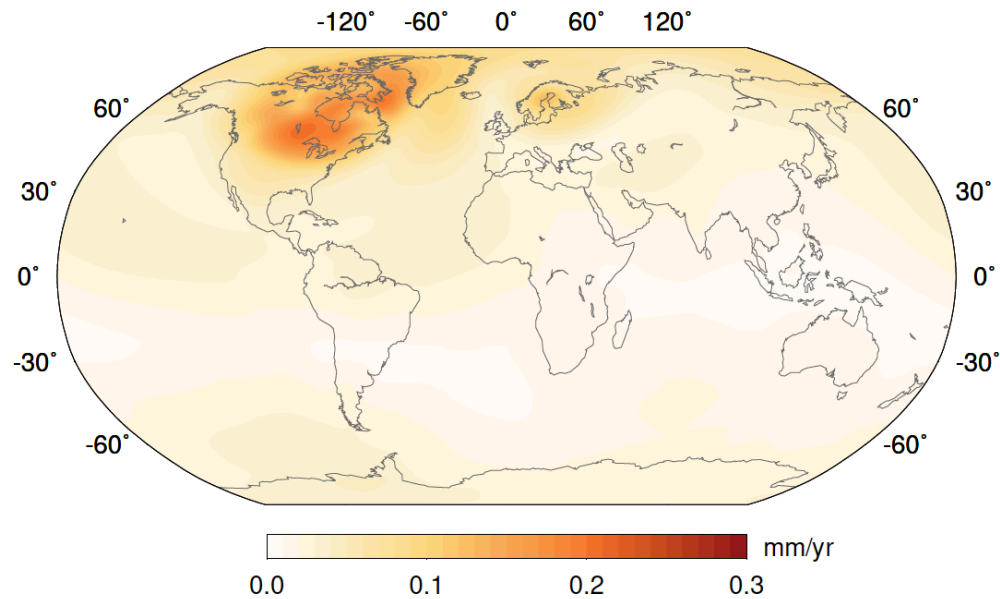

Figure R2: revised version of the bottom panel of Figure 1.

## II) Polar motion.

Some of the unclear wording used in the submitted manuscript was related to an effort to explain how we had dealt with the fact that a linear mean pole seemed to have been removed from the GRACE fields in the processing phase.

As it turns out, this was a misunderstanding from our side. In reality, that part of the linear mean polar motion that is due to GIA and to long-term changes in the water layer is still included in the Level-2 GRACE data used in this study (John Ries, personal communication). We have therefore modified the present-day fingerprints, in order to include the effect of the rotational feedback to the sea-level equation, which generated fingerprints with a much larger degree 2 order 1 coefficients.

In addition, we have improved how we construct the GIA degree 2 order 1 fingerprint (i.e., the GIA-induced polar motion fingerprint), by introducing a 2-step procedure. In step 1, we run the inversion by using six regional GIA fingerprints, generated without rotational feedback. We then take the six resulting pairs of degree 2 order 1 coefficients and we add them together to form a new GIA-induced polar motion fingerprint. In step 2, we run the inversion again, where the degree 2 order 1 coefficients of the six GIA fingerprints are set to zero, and where the GIA-induced polar motion fingerprint is treated separately (albeit with the  $C_{21}/S_{21}$  ratio determined in step 1). In the original manuscript, we were directly building the GIA-induced polar motion fingerprint from the unscaled version of the six regional GIA fingerprints (i.e., step 2 only).

Both improvements together produced a GIA-induced polar motion solution with a considerably different direction (about  $78^\circ$  W instead of  $88^\circ$  W) and larger magnitude (0.52 deg/Ma instead of 0.37 deg/Ma). More importantly, when adding together the GIA and the water layer contributions, we are able to account for about 95% of the trend in both GRACE degree 2 order 1 coefficients.

Below, we reproduce the new figure showing the effect of mass redistribution in the water layer.

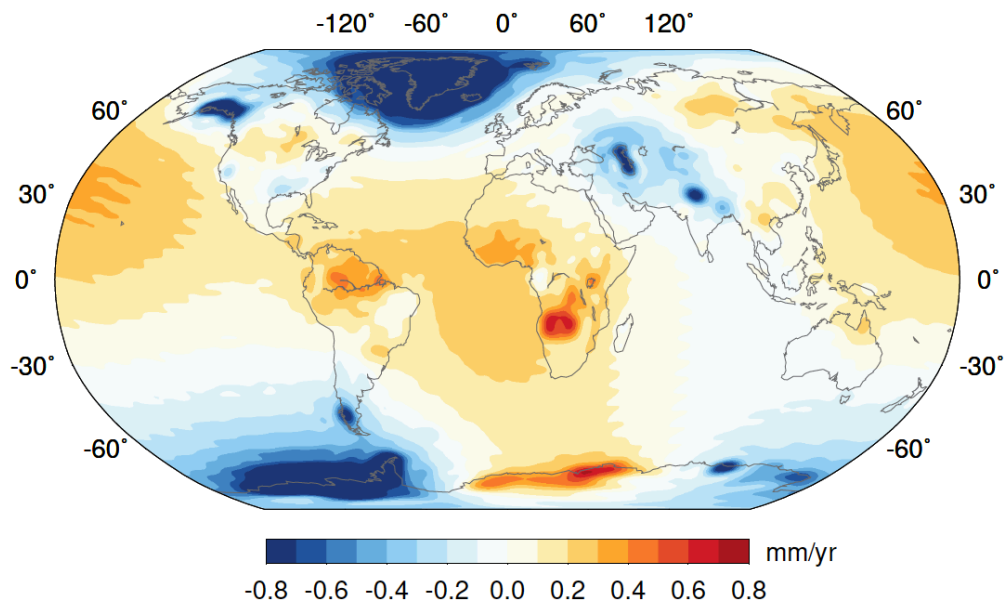

Figure R3: revised version of the top panel of Figure 2

Here follows a point-by-point answer to the Referee's comments (reproduced in italics).

- 1) *The current submission attempts to isolate a new empirical GIA model by developing an ensemble based upon forward modeling, finding some statistics of those models and then by addition/subtraction from the GRACE-OBP methodology of Sun et al. (2019, GRL 46 <https://doi.org/10.1029/2018GL080607>) deliver an empirical model based upon GRACE RL06 alone.*

We would like to clarify that there is no methodological link between the current study, which indeed builds upon Sun et al. (2019) and the GRACE-OBP approach discussed by Sun et al. (2016, JGR & JGeod), which represented an improvement upon Swenson et al. (2008).

- 2) *One of the greatest difficulties that the authors are faced with is that of properly dealing with, and quantifying, the error propagation, and they do not appear to have dealt with this in any way. Furthermore, the ensemble forward model set has little to offer that convinces me that it is a statistical sampling.*

See point 1) above.

- 3) *More damning is the fact that the authors don't seem particularly convinced themselves: A careful reading of the Conclusions (section 6) is in order. The first paragraph states: "In addition, the estimated ocean mass change and the contributions of its individual sources are in line with most of the recent literature". And in the second paragraph they provide equally unenthusiastic statements about GIA: "The uncertainties obtained for the individual contributors provide a realistic*

*quantification of the global role of GIA in GRACE-based estimates of present-day mass redistribution.” This statement is tantamount to an admission of failure.*

We regret having given the impression that we were not convinced by our own results. The fact that we managed to reproduce recently published estimates of ocean mass change was meant as an independent proof of the correctness of our results. In fact, the updated solution shows a smaller trend in ocean mass change ( $1.2 \pm 0.4$  mm/yr), mainly due to a larger negative contribution of TWS, in turn largely caused by properly accounting for polar motion. We consider this an important result of the current study, since the contribution of TWS to ocean mass change is still debated.

Concerning the second quoted sentence (“The uncertainties... mass redistribution”), we honestly do not understand how that could be tantamount to an admission of failure. If the issue is represented by the large GIA error (0.8 mm/yr at 90% level, with the new ensemble), we wish to strongly reject the strictly quantitative notion that the value of a model solely depends on its numerical accuracy.

- 4) *1st sentence Abstract. This statement is generally false. At best, GIA models perform updates between viscosity models and ice sheet history models. It is very rare that they are solved for simultaneously, and especially if the ice flow is computed dynamically.*

True. “ that simultaneously solve for...” will be replaced by “that solve for both...”.

- 5) *In the abstract, it would be nice to know what the 1 or 2 sigma uncertainty is in the J2 dot solution using the GRACE-OBP method and that which is GIA-empirically determined.*

The J2 dot uncertainties were listed in Table 2, but indeed they should have also appeared in the abstract, possibly specifying the individual GIA and water layer contributions. We note that now, with a larger ensemble, one standard deviation is 23% of the GIA contribution and 6% of the water layer contribution.

- 6) *Line 30, Section 1. The referred papers for earth rotational GIA are more than 30 years old. The modern literature is actually quite rich, and I suggest referencing a paper like those published by Nakada or Mitrovica during the last 5 years.*

We expressly cited the seminal papers, considering that the paragraph started with the word “Historically”, but we will add references to a few recent papers, as suggested.

- 7) *Line 46, Section 1. The approach is claimed to be like one developed originally by Rietbroeck. But the latter used ocean altimetry, and that is not being used here. The authors need to clarify. Would the current study have been more successful if also employing ocean altimetry, or less so?*

Indeed, the present study makes use of a sub-set of the observations used by Rietbroek et al. (2012). However, this choice is deliberate, as discussed at the beginning of the discussion section (Sec.4) and highly appreciated by Referee 1. The problem with using different

datasets, especially when originating from independent satellite missions, is that it is extremely difficult to quantify possible systematic errors, such as those coming from representing all observations in a consistent reference frame. At this stage, we are not able to quantify the possible gain or loss of accuracy that the use of altimetry data would introduce, nor we think it should be the objective of this study, since it would require a considerable modification of our approach. Nonetheless, we will make clear in the introduction that one of the differences with respect to Rietbroek et al. (2012) is the use of a single data source.

- 8) *Line 72, Section 2.1. The use of the phrasing “allows to” should be changed as it is grammatically incorrect. Use something like, “provides sufficient information for partitioning”.*

We will correct the sentence as suggested.

- 9) *Lines 72-73, Section 2.1 The use of “somehow” is quite odd in this context. (This occurs later). This is a red flag for a reviewer. If it is a ‘somehow’ then there is something that the reader must take as either suspicious or done with uncertainty, at best. It therefore needs much clarification.*

We agree with the comment, and we will remove the word “somehow” altogether, since the purpose was not to spread or hide doubts. We simply meant that the solid earth, the cryosphere and land hydrology are all part of the same earth system, hence not completely independent. Nonetheless, they can be treated as being independent for the purpose of this study, because of the relatively short time span covered by GRACE observations.

- 10) *Lines 80 – 85 Section 2.2. As described, this is not an ensemble. No real statistics can be derived from these 4 forward models. One could say: The spread is ... and we assert that it is representative of the one sigma about some average. But there is utterly no statistical significance to these. And, by the way, each of the models have their own mountains of data that both support and bias them, and that have data gaps and under/oversampling, none of which is being treated in your empirical procedures.*

We have addressed this issue in point I). We assume that the effect of biases in the original ice histories will be reflected in the uncertainties resulting from the new ensemble.

- 11) *Line 89, Section 2.2. “think” -> “thick”.*

Corrected.

- 12) *Lines 104-108, Section 2.3. This entire explanation of the procedure to deal with rotationally related surface mass change and GIA has to be redone. I suggest writing out the terms in equation form: What exactly in the end is solved for, and what is the uncertainty? I am completely lost, and if I read the logic – verbatim – I would be led to the conclusion that the paper is simply wrong. I have faith that the author’s*

*understanding of all this is more-or-less sound, so I think it is just a series of poor explanation(s) that is involved. It's really a weak part of the paper, however.*

*13) Lines 109-111, Section 2.2. This statement seems contradictory. If not included, why discuss it here and later in the paper? I am quite confused.*

*14) Lines 125-129, Section 3. Again, we return to this confusion about pole-tide and its appearance in the fingerprint maps. What does this mean, or does it even have a meaning? Is it perhaps an artifact? I am not criticizing, I am just confused.*

We have addressed issues 12-14 in point II) and we will amend the text accordingly.

*15) Lines 137-139, Section 3. The sentence starting "The uncertainty overall... " is disturbing, for this is exactly where an empirical model, if at all valuable, might help advancing science. I return to this criticism below, with respect to the 'coupling' to hydrological signal.*

Thanks to the use of a larger ensemble, discussed in point I), the error plots will be considerably different (as shown by Figure R2).

*16) Lines 149-153. Section 3. The proposed explanation for the round region in south Atlantic seems very speculative: a trend in TWS not removed in the pole-tide correction. (?) There should be more explanation to justify this. Why not cumulative errors propagated from GRACE RL06, including the de-aliasing models? Since no error propagation analysis was conducted here, then how do we assess this assertion?*

This explanation was rather concise, hence possibly not clear. We knew that we could not reproduce a large portion of the trend in the C21 and S21 GRACE coefficients, which are directly related to polar motion. This because we had expressly excluded the rotational feedback from the present-day fingerprints. Besides, by "water layer" (line 150), we actually meant to refer to the cryosphere as well, where the Greenland Ice Sheet is by far the largest driver of ongoing polar motion. We did not consider the residual to be possibly related to a mismodelling of the GIA contribution, since the direction of the residual polar motion was not consistent with a GIA source.

However, none of this is relevant anymore, due to the updated treatment of polar motion, as discussed in point II).

*17) Lines 155-156. Section 3. "At the same time, the uncertainties provide...". I suggest the same comment that was mentioned concerning the vagaries of the conclusions. Now those apply here as well. I elaborate on the criticism. I refer to a recent paper by Jensen, L., Eicker, A., Dobslaw, H., Stacke, T., & Humphrey, V. (2019). Longterm wetting and drying trends in land water storage derived from GRACE and CMIP5 models. *J. Geophys. Res.: Atmospheres*, 124. <https://doi.org/10.1029/2018JD029989>. In Figure 1 of this paper we see a map of the TWS trends from ITSG-Grace2018s. In that map, note the region of negative ( $-10$  to  $-20$  mm/yr equivalent water) to the west and south of Hudson Bay, and that also rings across northern Canada in red, and the outer blue ring at amplitude 5 – 15 mm/yr outside of these. Are those really*

*TWS, or are they mismodeled GIA? We can deduce that such questions should apply just by looking at the Jensen 2019 map. So, what, if anything, has the current paper submitted to ESD contributed to this? Has it (the present paper) just affirmed what we surmise from Figure 1 of Jensen?*

We are very thankful for this comment, since we were not aware of that paper. We have prepared Figure R4, similar to Fig.1 in Jensen et al. (2019), and indeed our results are very different to the west and south-west of Hudson Bay: the large negative spots in Jensen et al. (2019) are actually positive (about 10 mm/yr, at comparable spatial scales) and significant (uncertainty generally smaller than 5 mm/yr in the areas where the signal peaks at more than 10 mm/yr). Notably, in the area west of Hudson Bay, our solution is also more than 10 mm/yr smaller than ICE-6G predictions. In other words, our results suggest that the GRACE-based solution of Jensen et al. (2019) around Hudson Bay is likely biased by mismodelled GIA. This will be discussed in the revised version of our paper.

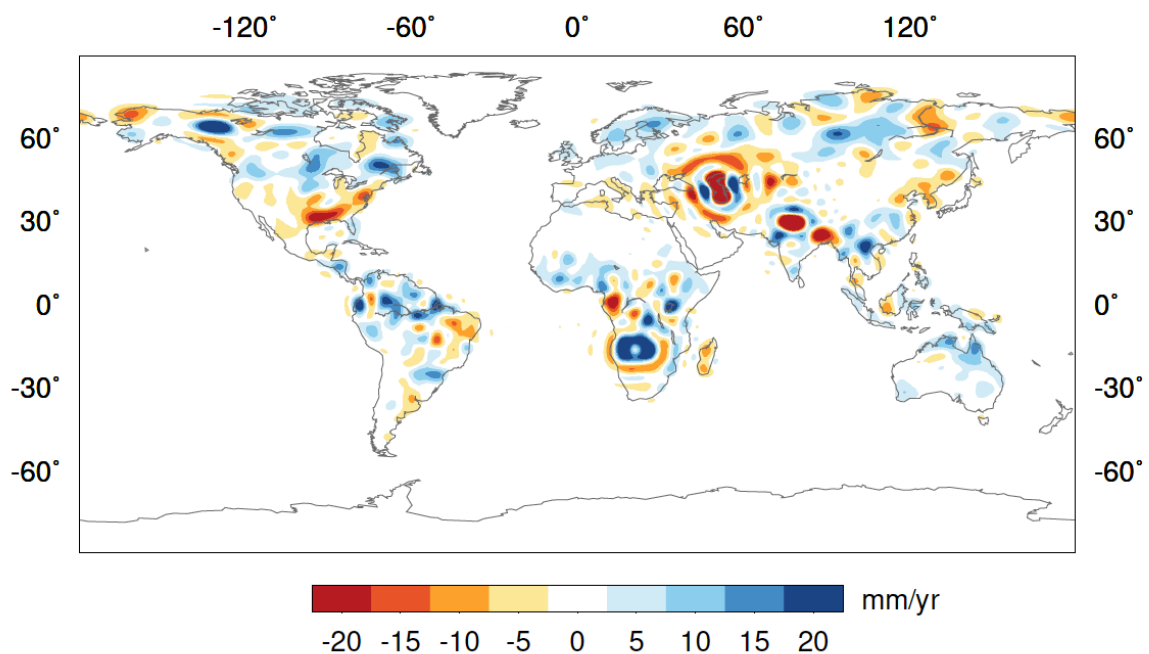

Figure R4: TWS trend from the new ensemble solution.

*18) Lines 158-160, Section 3. A 300 km buffer is employed. But no Gauss filter is mentioned, so I assume it is not used, and all the signal generated by fingerprint EOFs. What does the buffering do? Some of that buffering will get rid of real signal, not just gravitational artifact, as was the minor point being made by Sterenborg.*

We realise we have not been clear. We note that, for the purpose of obtaining spatially integrated estimates, limits in GRACE resolution often require the use of buffer zones (or other forms of integration kernels), even when no smoothing is applied. Besides, we will revise the text to be more specific about the content of Table 1.

Table 1 listed seven lines. Three of them (Glaciers, Greenland and Antarctica) represent the cryospheric contribution to GMSL: the values listed are obtained directly from the scaling

factors of the fingerprints (which are generated from a known surface load change), in this way avoiding any leakage/buffer issue, since no spatial integration of GRACE fields is actually preformed. The TWS contribution could not be quantified in the same way, since we made use of the EOF fingerprints by Rietbroek et al. (2016). However, considering that the signal from continental hydrology is spread over a very large area, and mostly not in coastal regions, little signal would be lost by the use of a buffer (we have verified that the results are unchanged for buffer sizes of 200-300 km, and only 20% smaller when not using any buffer at all).

The remaining three lines represented: the sum of the previously mentioned contributors (GMSL), and two terms specifically related to GRACE-based GMSL estimates, i.e., the GIA contribution and the residual signal. The GIA contribution was meant to show how much GRACE-based GMSL trend estimates need a GIA model (65% of the total GMSL, in the new ensemble). The residual signal was meant to show which portion of the original GRACE trend remained unexplained: additional tests have revealed that this last number is actually highly depended on the buffer size (with the new ensemble, it reduces to zero when using no buffer at all), so it contains little information and will be removed from the updated table.

*19) Lines 165-167, Section 3. The estimate of GIA signal is compared to that of Tamisiea. But this is difficult to make much of, as the statement is too equivocal: It is better to state it quantitatively: "We estimate a GIA [thing] of  $x.x \pm y.y$ , whereas Tamisiea estimated  $b.b \pm c.c$ , for that same GIA [thing]."*

Agree. We will be more quantitative: our estimate of the GIA contribution to global mean ocean mass change trend, expressed in term of equivalent water height, is  $0.8 \pm 0.5$  mm/yr, whereas Tamisiea (2011) estimated values between 0.8-1.7 mm/yr.

*20) Lines 175-178, Section 3. A lot is made here of determining a partition of the J2 signal, and convincing (and seemingly rigorous) work was established in Sun et al (2019). But this disambiguation, as reported here, seems notably unconvincing without evaluating error propagation, or at minimum, estimation.*

Agree. As discussed in point I), we have now determined uncertainties from a larger ensemble. We will also more specifically refer to Sun et al. (2019).

*21) Lines 190-192, Section 4. The statement: "... by using only one dataset we get... on the final solution", is a good one, and maybe in a Brevia paper to this journal that explicit point can be made, even convincing some that it is important! But it is quite challenging to recast this work into something that would convince us that science is being advanced, even by a small epsilon.*

We certainly hope that the Referee will appreciate the revised manuscript. About the suggestion of preparing a Brevia, we think we have already produced a rather concise manuscript. Nonetheless, we believe that all figures and tables are necessary to convey our message, and those would not fit in an even shorter manuscript.



*22) Lines 201-207, Section 5 and final remarks. Again, the big deficit to this paper is that lack of any attention to error propagation, as I suspect that if that were done a similar, but quite useful quantitative conclusion might be discovered. Such quantification could become a valuable thing, especially with respect to planning the next generation of space gravimetry missions.*

We thank the Referee for those encouraging words and again hope that they will be satisfied by the revised manuscript.

Kind regards,  
Riccardo Riva and Yu Sun
